# Supplementary material for: Parkinson’s disease protein DJ-1 regulates ATP synthase protein components to increase neuronal process outgrowth
Source: PubMed Central journal article supplement (PMC6565618; doi:10.1038/s41419-019-1679-x), 2019-06-13

**Fig. S1**

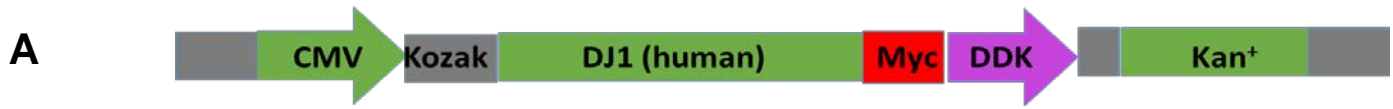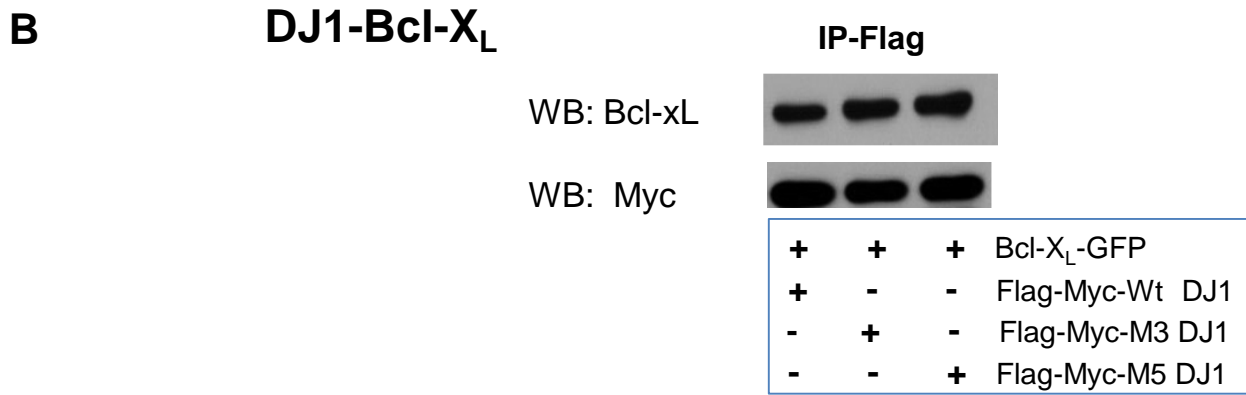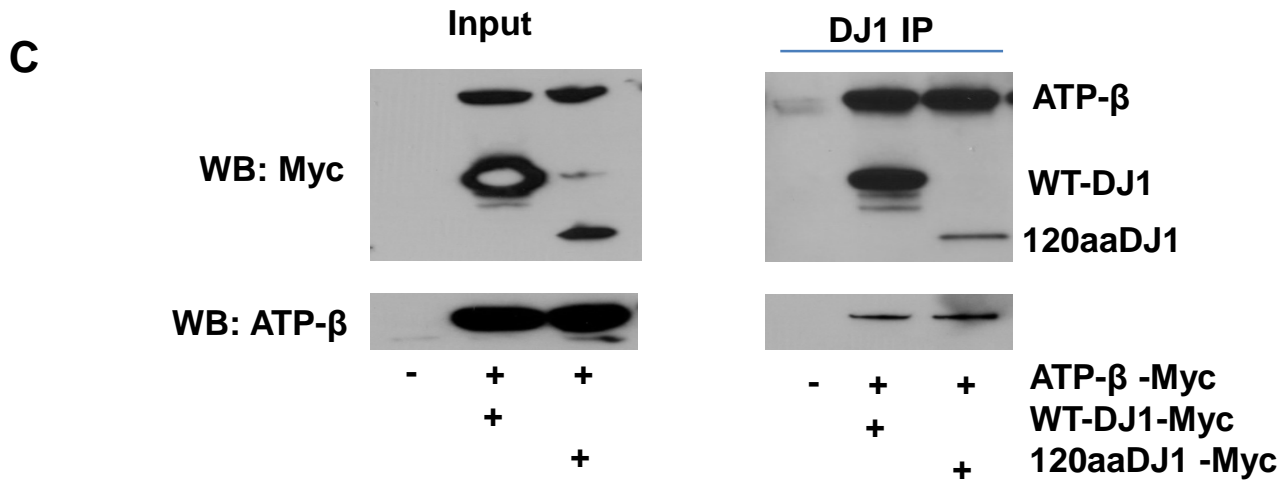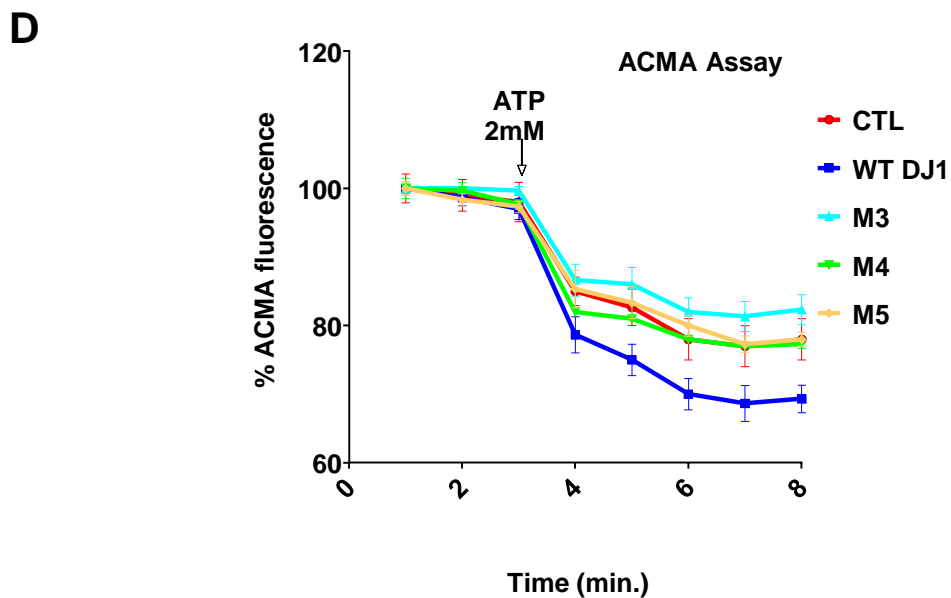

**Fig. S2**

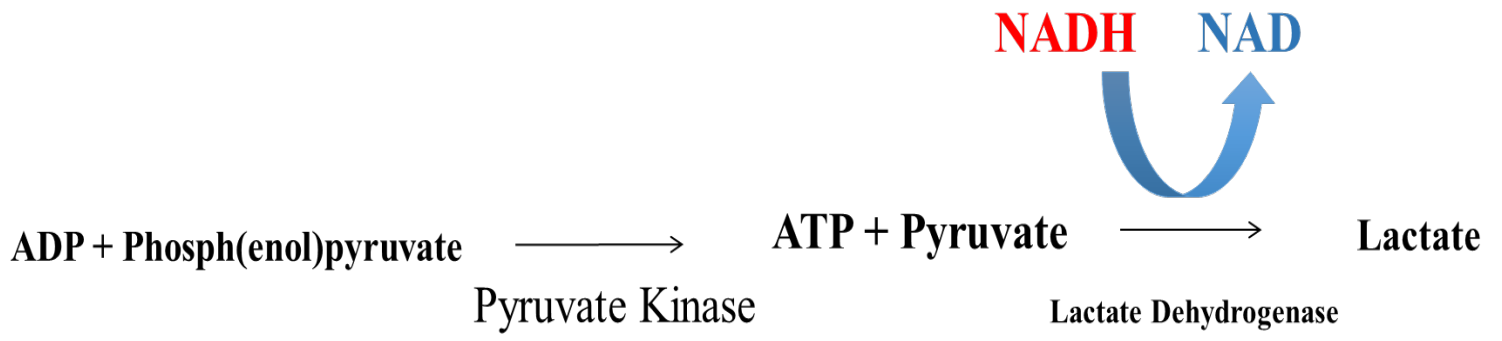

**Fig S3**

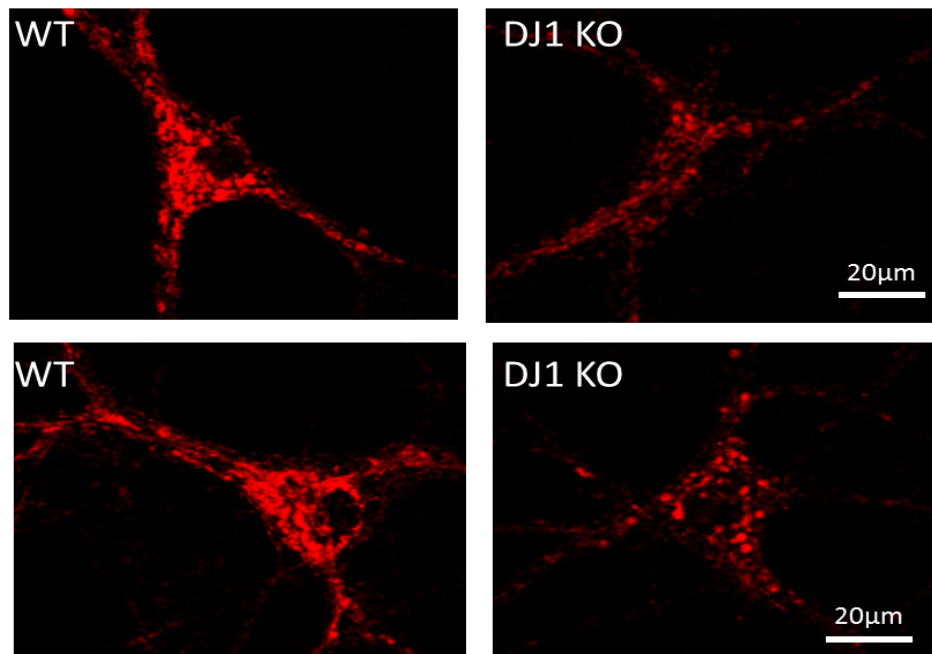

**Fig S4**

**A**

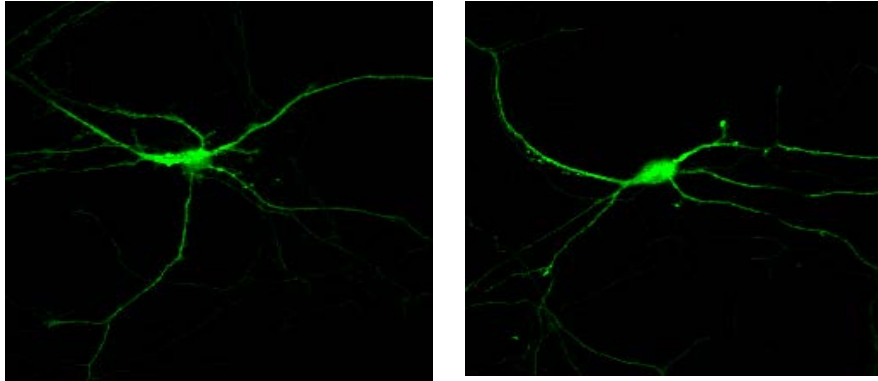

**B**

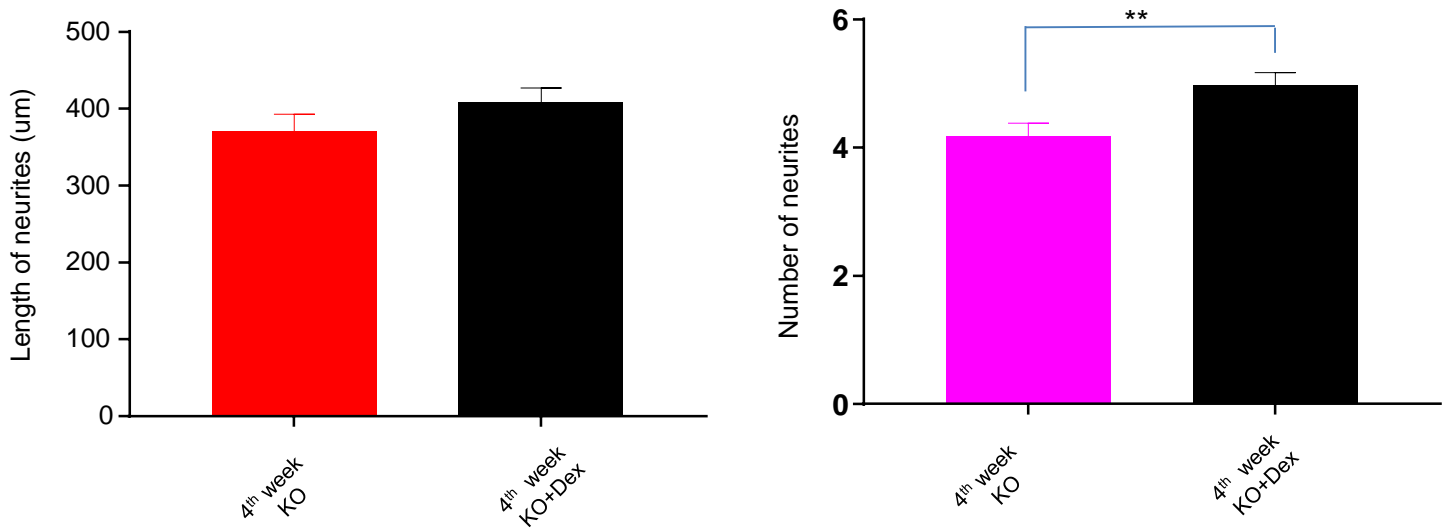

Supplement: 41419_2019_1679_MOESM1_ESM.pdf [file 41419_2019_1679_MOESM1_ESM.pdf]
